# Supplementary material
Source: PubMed Central journal article supplement (PMC4090265)
Supplement: NIHMS586228-supplement-2.pdf [file NIHMS586228-supplement-2.pdf]

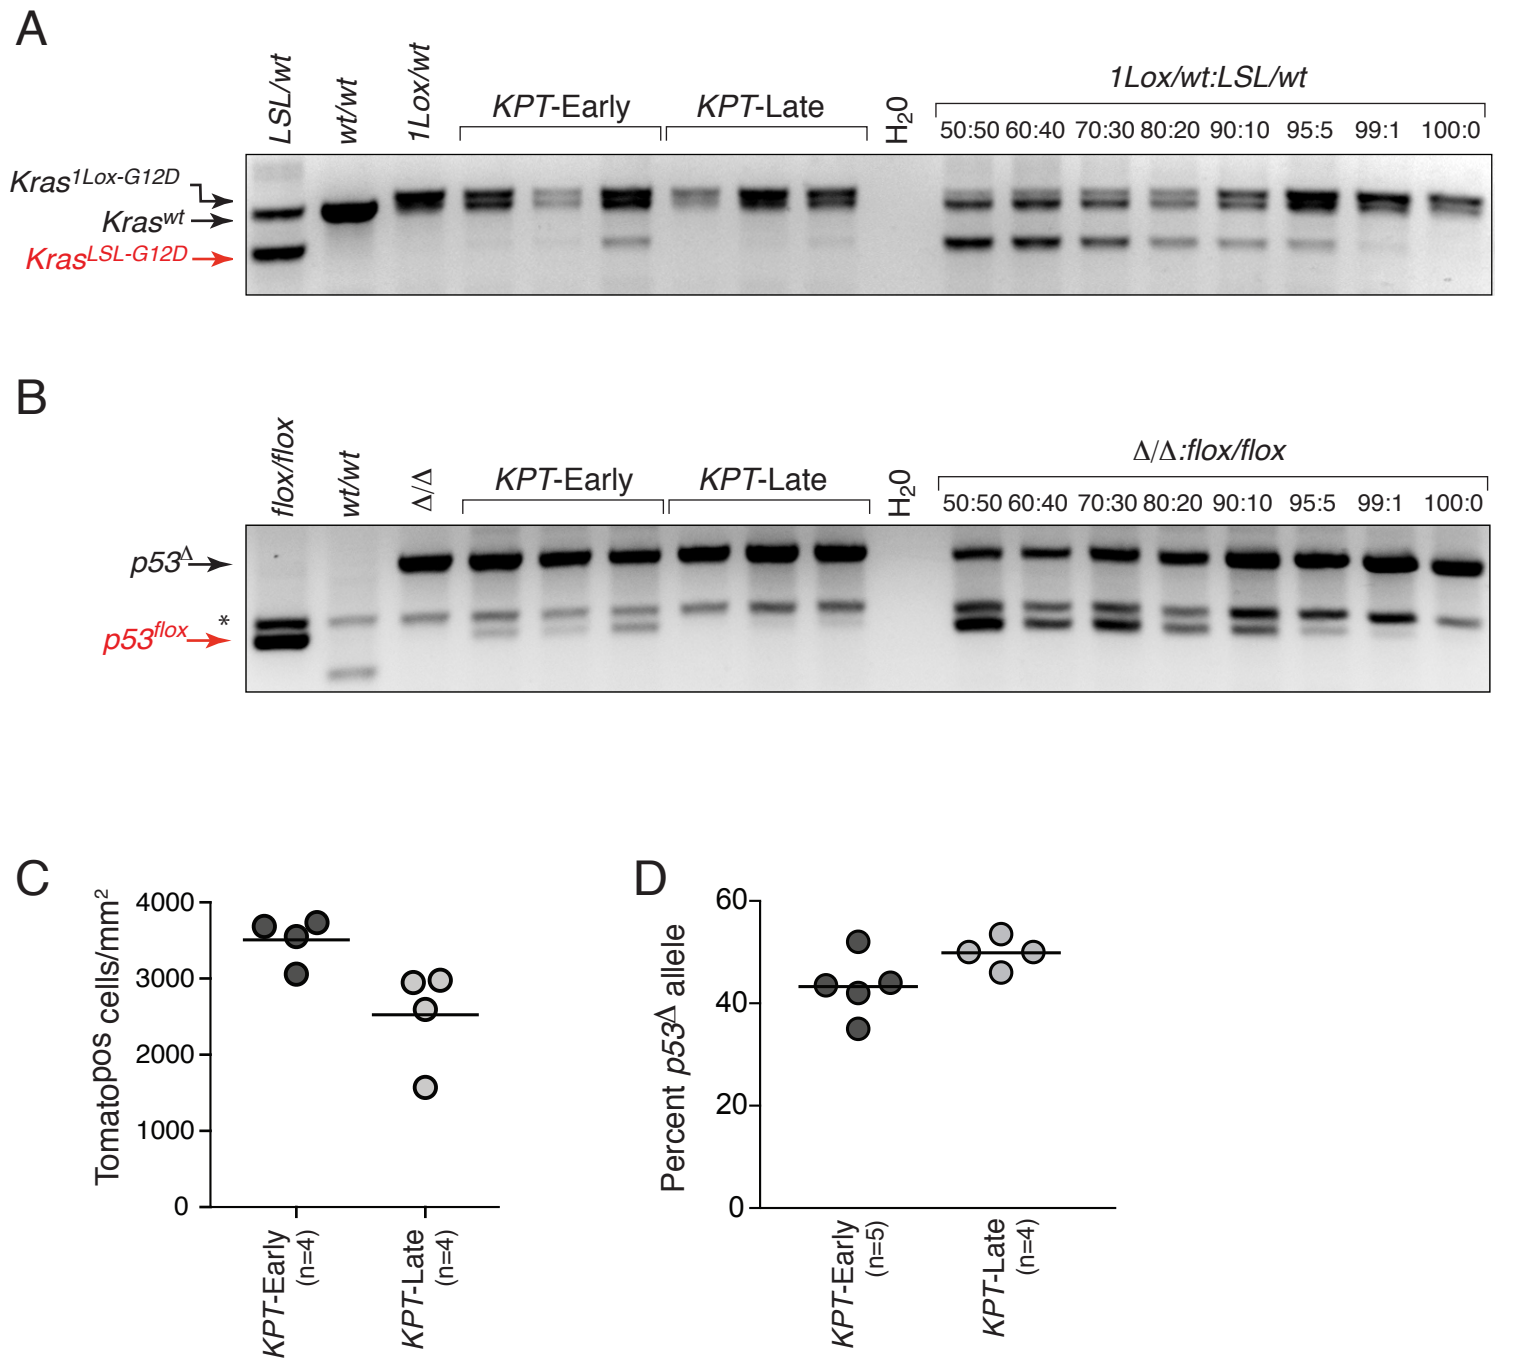

**Supplemental Figure 2. Similar total tumor burden and core genomic alterations in *KPT*-Early and *KPT*-Late mice**  
**A., B.** Expanding Tomatopositive cells from *KPT*-Early and *KPT*-Late mice have fully recombined *Kras*<sup>LSL-G12D</sup> and *p53*<sup>floxed</sup> alleles. Semi quantitative genomic PCR was used to assess the portion of *Kras*<sup>LSL-G12D</sup> alleles and *p53*<sup>floxed</sup> alleles that were recombined. Recombination in Tomatopositive cells from *KPT*-Early and *KPT*-Late mice was compared to a standard titration of *p53*<sup>floxed</sup> to *p53*<sup>Δ</sup> or *Kras*<sup>LSL-G12D</sup> to *Kras*<sup>1lox-G12D</sup> from tail and cell line DNA. Recombination efficiency was >95% for all samples. (\*) Background band.  
**C.** To determine the relative tumor burden between *KPT*-Early and *KPT*-Late mice, immunohistochemistry was used to stain and count Tomatopos cells. Each dot represents a mouse and the bar represents the mean.  
**D.** To estimate the total cancer burden in *KPT*-Early and *KPT*-Late mice we used semi quantitative genomic PCR to assess the percent of the *p53*<sup>floxed</sup> alleles that were recombined into the *p53*<sup>Δ</sup> form. *p53* recombination in *KPT*-Early and *KPT*-Late total lung DNA was compared to a standard titration of *p53*<sup>floxed</sup> to *p53*<sup>Δ</sup> alleles to determine the tumor cell to normal cell ratio. Densitometry of the *p53*<sup>floxed</sup> and *p53*<sup>Δ</sup> PCR bands for the standards and experimental samples allowed the percent recombined *p53* to be interpolated for each mouse. Each dot represents a mouse and the bar represents the mean.
