# Supplementary material
Source: PubMed Central journal article supplement (PMC4090265)
Supplement: NIHMS586228-supplement-3.pdf [file NIHMS586228-supplement-3.pdf]

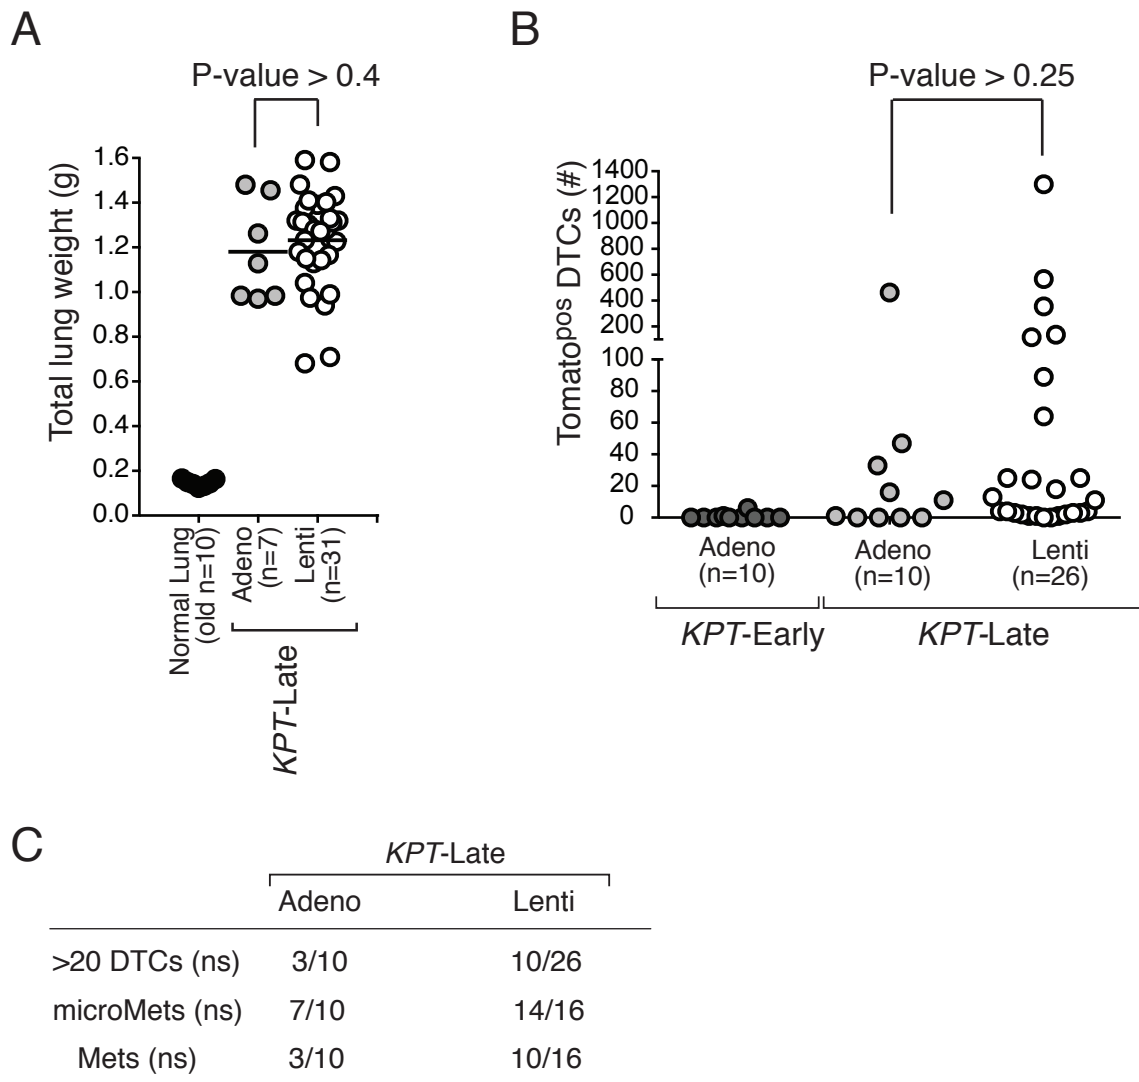

**Supplemental Figure 3. *KPT-Late* mice with lung tumor initiated with adenoviral or lentiviral Cre vectors have similar progression and metastasis**

**A.** Quantification of the lung weight of *KPT-Late* mice with tumors induced with Adenoviral-Cre (Adeno) or Lentiviral-Cre (Lenti). At the timepoint of analysis there was no significant difference between mice with tumors initiated with Adeno-Cre or Lenti-Cre (Mann-Whitney test). Lung weight of aged matched control non-tumor bearing mice is shown and the number of mice in each group is indicated. Each dot represents a mouse and the line represents the mean.

**B.** There is no significant difference in the number of DTCs between mice with tumors initiated with Adeno-Cre or Lenti-Cre (Mann-Whitney test). Quantification of the number of disseminating tumor cells (DTCs) in *KPT-Late* in which tumors were initiated with Adeno-Cre and Lenti-Cre. *KPT-Early* mice are also shown and the number of mice in each group is indicated. Each dot represents a mouse and the line represents the mean.

**C.** *KPT-Late* mice with tumors induced with Adenoviral-Cre (Adeno) or Lentiviral-Cre (Lenti) do not differ in the frequency at which they have DTCs, micrometastases or macrometastases. The number of mice with more than 20 DTCs, with micrometastases, or with macrometastases out of the total number of mice in each group is shown. ns = Not statistically significant (Fischer's Exact Test).
