# Supplementary material
Source: PubMed Central journal article supplement (PMC4090265)
Supplement: NIHMS586228-supplement-4.pdf [file NIHMS586228-supplement-4.pdf]

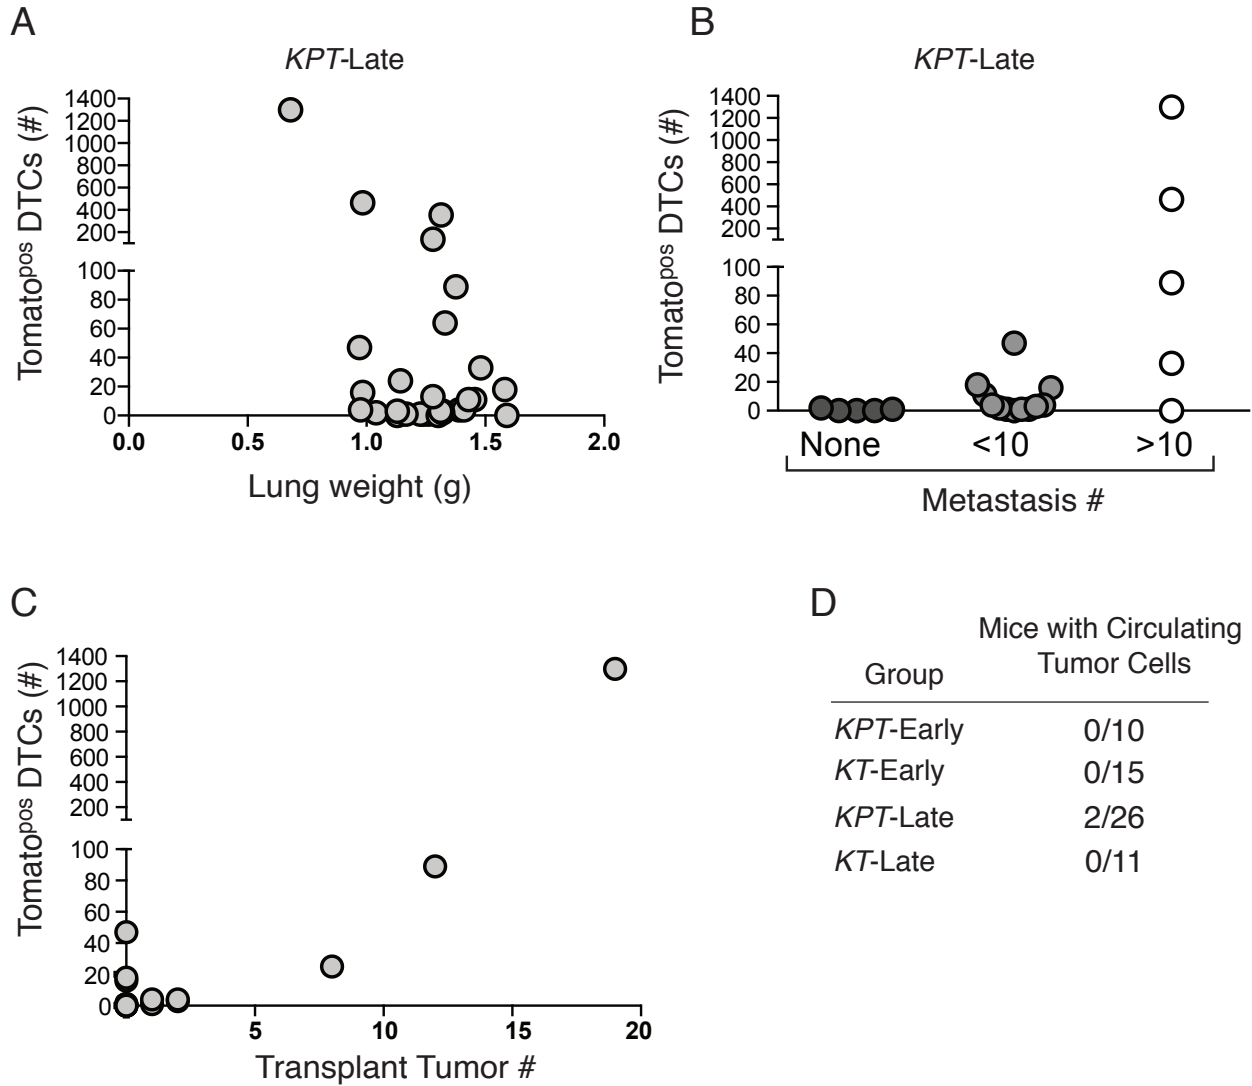

**Supplemental Figure 4. *KPT*-Late mice have a diverse numbers of disseminated tumor cells**

**A.** DTC number does not correlate with total lung tumor mass. Total lung weight and the number of Tomato<sup>positive</sup> DTCs in the pleural cavity is shown. In all figures the number of DTCs detected in 1/3 of the pleural fluid from each mouse is shown. Each dot represents a mouse.

**B.** DTC number correlates with the number of metastases. Each dot represents a mouse.

**C.** Relationship of the number of Tomato<sup>positive</sup> DTCs with the number of experimental metastases that form after intravenous transplantation of the 1/4 of the total pleural cavity cells. Each dot represents a mouse. Note the split scale.

**D.** Circulating tumor cells are detected in *KPT*-Late mice but not in *KT*-Early, *KT*-Late, or *KPT*-Early mice. Data is the number of mice with circulating tumor cells/total number of mice in analyzed in each group.
