# Supplementary material
Source: PubMed Central journal article supplement (PMC4090265)
Supplement: NIHMS586228-supplement-5.pdf [file NIHMS586228-supplement-5.pdf]

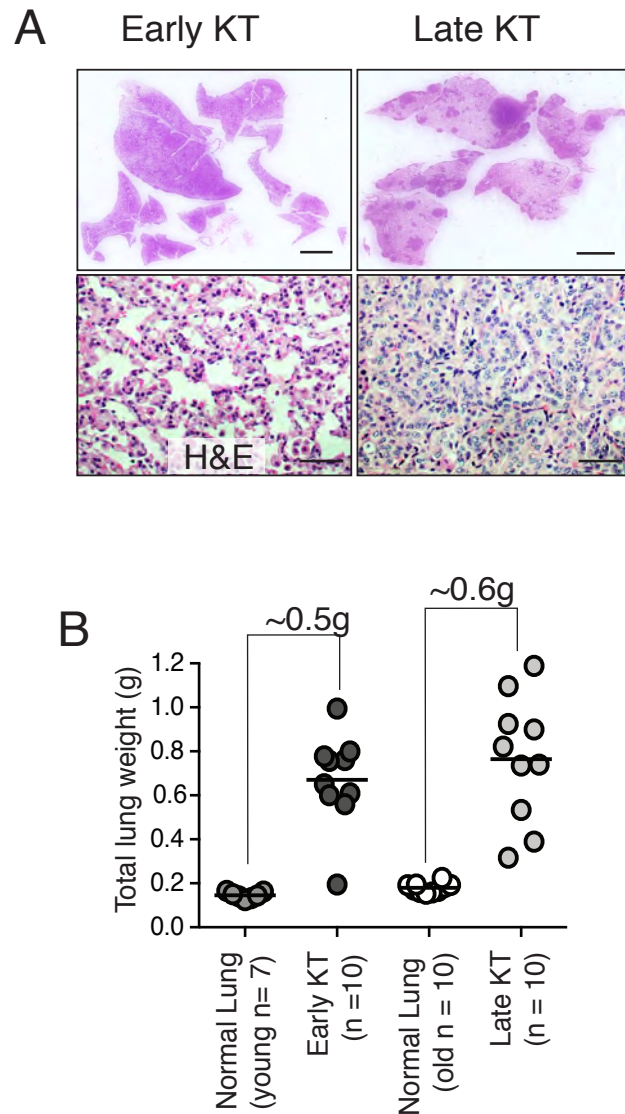

**Supplemental Figure 5. *KT*-Early and *KT*-Late mice have high total tumor burden**

**A.** *KT*-Early lungs have diffuse hyperplasia throughout the aveolar space. *KT*-Late lungs have adenomas and early stage adenocarcinoma among areas of normal lung. Representative H&E images are shown. Top scale bar is 3mm. Bottom scale bar is 50 $\mu$ m.

**B.** *KT*-Early and *KT*-Late mice have dramatically increased lung weight relative to age matched normal lung. Each dot represents one mouse and the bar indicates the mean. *KT*-Early and *KT*-Late mice have similar tumor burden that approaches that in *KPT* mice (compare to Figure 1). Each dot represents one mouse and the bar indicates the mean. The number of mice in each group is indicated.
