# Supplementary material
Source: PubMed Central journal article supplement (PMC4090265)
Supplement: NIHMS586228-supplement-6.pdf [file NIHMS586228-supplement-6.pdf]

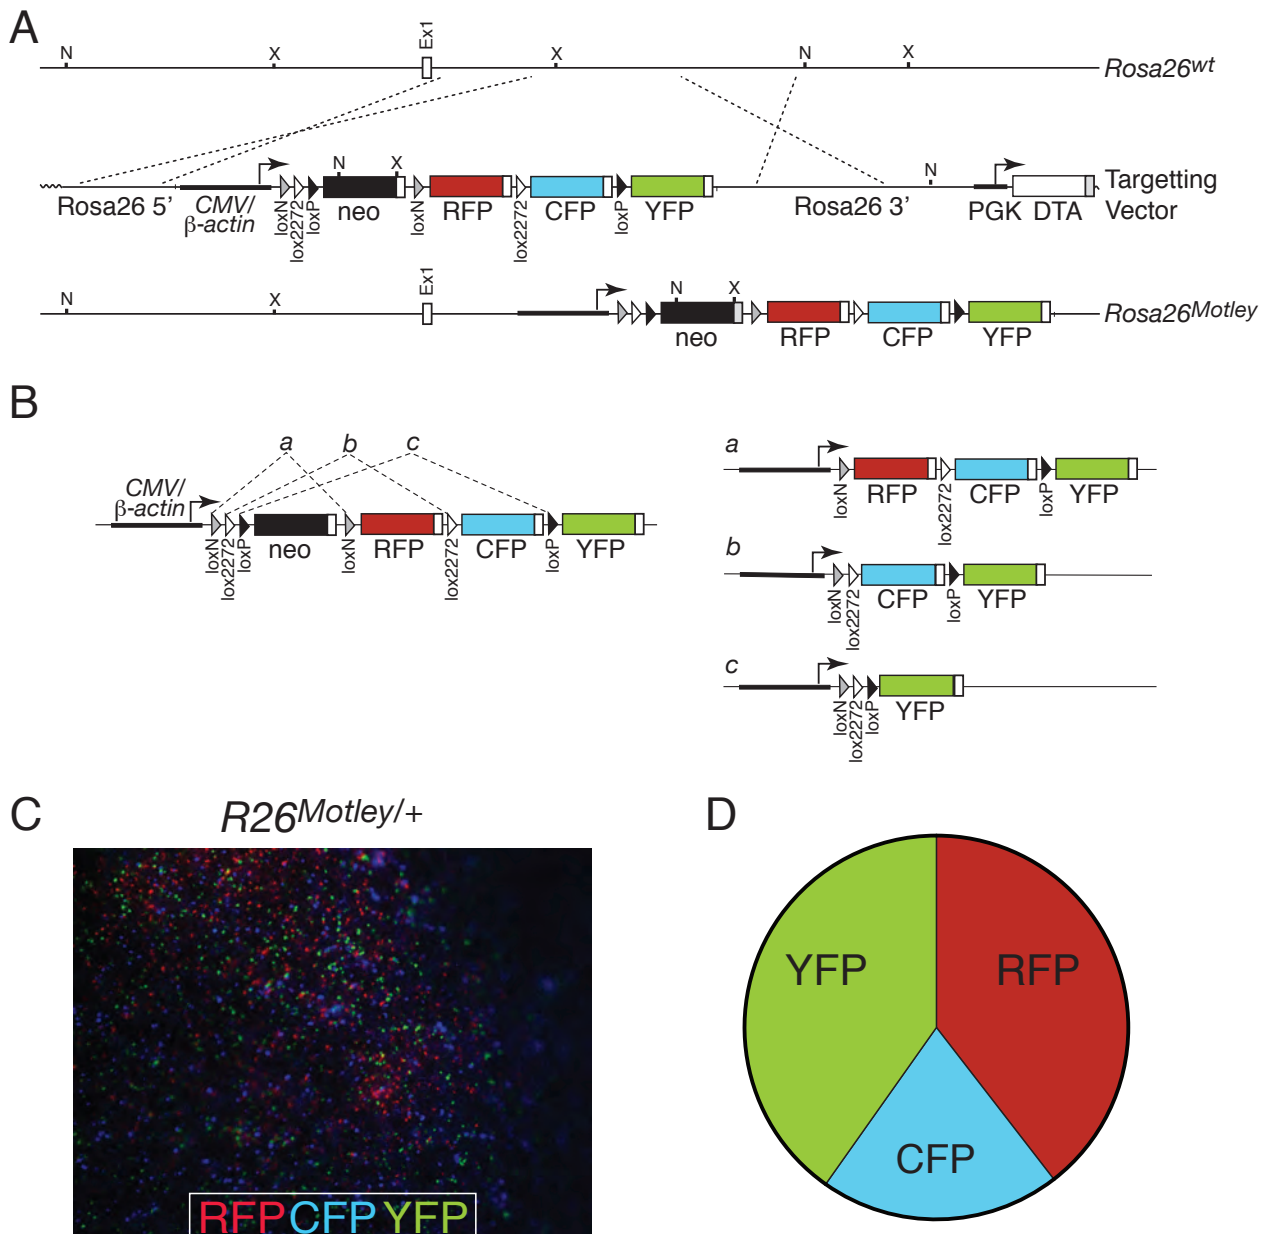

**Supplemental Figure 6. Generation and validation of the multicolor Motley reporter allele**

**A.** Diagram of the *Rosa26* locus before and after targeting. The neomycin resistance cassette (neo) functions as the positive selection marker for ES cell screening and as the transcriptional stop site. PolyA stop sequences are indicated by the short white rectangles at the end of each coding sequence. PGK-DTA is the negative selection marker

**B.** Heterotypic lox sites only allow recombination between their matching partners. The three possible recombination events (loxN = a, lox2272 = b, and loxP = c) are indicated, as are the resulting allele conformations. In each case only the first fluorescent protein is expressed.

**C.** Intratracheal adenoviral-Cre infection of *R26*<sup>Motley/+</sup> mice induces recombination and the expression of each fluorescence protein in distinct cells.

**D.** Quantification of the fraction of tumors of each color that develop in *Kras*<sup>LSLG12D/+</sup>; *p53*<sup>fllox/fllox</sup>; *R26*<sup>Motley/+</sup> mice. Data is from 291 tumors from 7 mice.
