# Supplementary material
Source: PubMed Central journal article supplement (PMC4090265)
Supplement: NIHMS586228-supplement-8.pdf [file NIHMS586228-supplement-8.pdf]

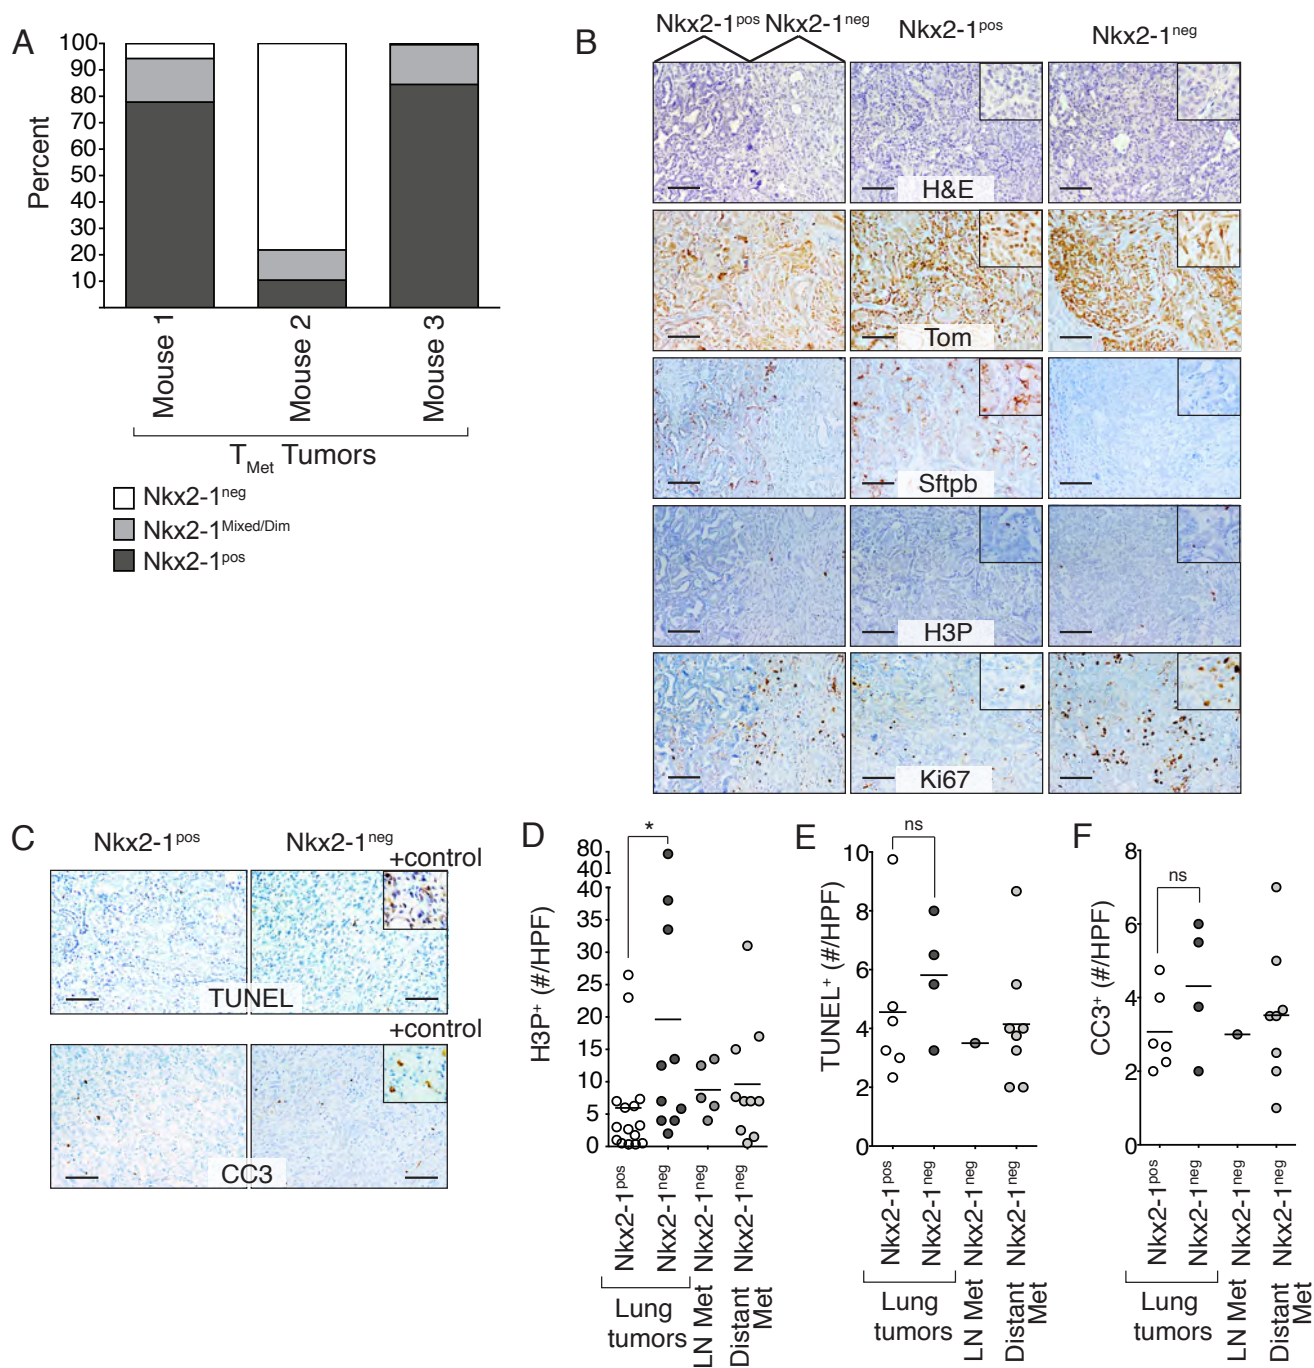

**Supplemental Figure 8: Nkx2-1<sup>neg</sup> areas have a selective advantage in primary T<sub>Met</sub> tumors with significantly higher levels of proliferation and insignificant changes in levels of cell death.**

**A.** Quantification of Nkx2-1<sup>pos</sup>, Nkx2-1<sup>Mixed/Dim</sup>, and Nkx2-1<sup>neg</sup> areas in T<sub>Met</sub> tumors. T<sub>Met</sub> tumors within the mouse contain Nkx2-1<sup>neg</sup> areas that comprise a variable fraction of the total tumor but cell lines derived from T<sub>Met</sub> tumors are Nkx2-1<sup>neg</sup> as assessed by western blotting, qPCR or microarray analysis (Winslow *et al*, 2011). This suggests that as these cell lines are selected during culture the Nkx2-1<sup>neg</sup> subpopulation outcompetes the Nkx2-1<sup>pos</sup> population. This selection could be driven by increased proliferation of cells within the Nkx2-1<sup>neg</sup> state or other aspects of the *in vitro* environment that select for the metastatic subclone.

**B.** Representative H&E and IHC images of Nkx2-1<sup>neg</sup> and Nkx2-1<sup>pos</sup> areas in *KPT*-Late tumors. Tumors were stained for tdTomato, the Nkx2-1 target surfactant protein B (Sftpb), phospho-histone H3 (H3P) and Ki67. Scale bar is 100µm in all panels. Inset shows higher magnification.

**C.** Representative IHC images for TUNEL and cleaved caspase 3 (CC3) staining. Very few positive cells can be detected in Nkx2-1<sup>pos</sup> or Nkx2-1<sup>neg</sup> areas. Inset shown positive staining on involuting breast tissue.

**D-F.** Quantification of H3P<sup>+</sup>(D), TUNEL<sup>+</sup>(E), and CC3<sup>+</sup>(F) cells in *KPT*-Late tumors. Each dot represents a tumor area and the bar represents the mean. Data is the number of positive cells per high power (40X) field (#/HPF). \*p-value < 0.025. ns = not significant.
